# Supplementary material for: Neonatal and maternal outcomes following SARS-CoV-2 infection and COVID-19 vaccination: a population-based matched cohort study
Source: PubMed Central journal article supplement (PMC10465539; doi:10.1038/s41467-023-40965-9), 2023-08-29
Supplement: 41467_2023_40965_MOESM1_ESM.pdf [file 41467_2023_40965_MOESM1_ESM.pdf]

## SUPPLEMENTARY MATERIAL

**Supplementary Table 1: Pre-matched characteristics of our exposed and unexposed pregnancies included in infection and vaccination analyses.**

|                                        | Infected     | Uninfected pre-matched controls | Vaccinated    | Unvaccinated pre-matched controls |
|----------------------------------------|--------------|---------------------------------|---------------|-----------------------------------|
| <b>Number of pregnancies</b>           | 4074         | 64559                           | 11379         | 38354                             |
| <b>Median maternal age (min-max)</b>   | 29 (14-45)   | 30 (13-55)                      | 32 (14-52)    | 30 (14-55)                        |
| <b>Maternal Deprivation</b>            |              |                                 |               |                                   |
| 1 (most deprived)                      | 1225 (30.1%) | 15544 (24.1%)                   | 1620 (14.2%)  | 9461 (24.7%)                      |
| 2                                      | 1028 (25.2%) | 13219 (20.5%)                   | 1838 (16.2%)  | 7898 (20.6%)                      |
| 3                                      | 681 (16.7%)  | 11875 (18.4%)                   | 2138 (18.8%)  | 7029 (18.3%)                      |
| 4                                      | 675 (16.6%)  | 13337 (20.7%)                   | 2864 (25.2%)  | 7896 (20.6%)                      |
| 5 (least deprived)                     | 465 (11.4%)  | 10530 (16.3%)                   | 2,917 (25.6%) | 6039 (15.7%)                      |
| Unknown/Missing                        | 0 (0%)       | 54 (0.1%)                       | 2 (<0.1%)     | 31 (0.1%)                         |
| <b>Maternal ethnicity</b>              |              |                                 |               |                                   |
| White                                  | 3611 (88.6%) | 53045 (82.2%)                   | 9845 (86.5%)  | 31947 (83.3%)                     |
| South Asian                            | 183 (4.5%)   | 2210 (3.4%)                     | 433 (3.8%)    | 1318 (3.4%)                       |
| Black/Caribbean/African                | 57 (1.4%)    | 1148 (1.8%)                     | 132 (1.2%)    | 743 (1.9%)                        |
| Other/mixed ethnicity                  | 156 (3.8%)   | 2427 (3.8%)                     | 468 (4.1%)    | 1481 (3.9%)                       |
| Unknown/Missing                        | 67 (1.6%)    | 5729 (8.9%)                     | 501 (4.4%)    | 2865 (7.5%)                       |
| <b>Maternal urban/rural status</b>     |              |                                 |               |                                   |
| Large urban areas                      | 1616 (39.7%) | 22940 (35.5%)                   | 4369 (38.4%)  | 13471 (35.1%)                     |
| Other urban areas                      | 1644 (40.4%) | 23903 (37.0%)                   | 3548 (31.2%)  | 14215 (37.1%)                     |
| Accessible small towns                 | 248 (6.1%)   | 5202 (8.1%)                     | 961 (8.4%)    | 3118 (8.1%)                       |
| Remote small towns                     | 89 (2.2%)    | 2089 (3.2%)                     | 346 (3.0%)    | 1213 (3.2%)                       |
| Accessible rural areas                 | 373 (9.2%)   | 7140 (11.1%)                    | 1459 (12.8%)  | 4259 (11.1%)                      |
| Remote rural areas                     | 81 (2.0%)    | 2899 (4.5%)                     | 601 (5.3%)    | 1805 (4.7%)                       |
| Unknown/Missing                        | 23 (0.6%)    | 386 (0.6%)                      | 95 (0.8%)     | 273 (0.7%)                        |
| <b>Parity</b>                          |              |                                 |               |                                   |
| 0                                      | 1655 (40.6%) | 27154 (42.1%)                   | 4824 (42.4%)  | 15940 (41.6%)                     |
| 1+                                     | 2298 (56.4%) | 35456 (54.9%)                   | 6164 (54.2%)  | 21219 (55.3%)                     |
| Unknown/missing                        | 121 (3.0%)   | 1949 (3.0%)                     | 391 (3.4%)    | 1195 (3.1%)                       |
| <b>Maternal clinical vulnerability</b> |              |                                 |               |                                   |
| Not clinically vulnerable              | 3012 (73.9%) | 47373 (73.4%)                   | 8411 (73.9%)  | 28301 (73.8%)                     |
| Clinically vulnerable                  | 1035 (25.4%) | 16595 (25.7%)                   | 2839 (24.9%)  | 9749 (25.4%)                      |
| Extremely vulnerable                   | 27 (0.7%)    | 591 (0.9%)                      | 129 (1.1%)    | 304 (0.8%)                        |
| <b>Maternal diabetes</b>               |              |                                 |               |                                   |
| No diabetes                            | 3749 (92.0%) | 59959 (92.9%)                   | 10411 (91.5%) | 35383 (92.3%)                     |
| Pre-existing diabetes                  | 28 (0.7%)    | 569 (0.9%)                      | 147 (1.3%)    | 313 (0.8%)                        |
| Gestational diabetes                   | 297 (7.3%)   | 4031 (6.2%)                     | 821 (7.2%)    | 2658 (6.9%)                       |
| <b>Maternal smoking status</b>         |              |                                 |               |                                   |
| Non-smoker                             | 2785 (68.4%) | 42699 (66.1%)                   | 8612 (75.7%)  | 25390 (66.2%)                     |
| Ex-smoker                              | 819 (20.1%)  | 12981 (20.1%)                   | 2074 (18.2%)  | 7663 (20.0%)                      |
| Smoker                                 | 468 (11.5%)  | 8573 (13.3%)                    | 679 (6.0%)    | 5188 (13.5%)                      |
| Unknown/Missing                        | 2 (<0.1%)    | 306 (0.5%)                      | 14 (0.1%)     | 113 (0.3%)                        |
| <b>Body mass index</b>                 |              |                                 |               |                                   |
| Underweight                            | 90 (2.2%)    | 1759 (2.7%)                     | 176 (1.5%)    | 1022 (2.7%)                       |
| Healthy weight                         | 1411 (34.6%) | 24253 (37.6%)                   | 4324 (38%)    | 14299 (37.3%)                     |
| Overweight                             | 1288 (31.6%) | 19232 (29.8%)                   | 3431 (30.2%)  | 11504 (30.0%)                     |
| Obese/severely obese                   | 1203 (29.5%) | 17585 (27.2%)                   | 3183 (28%)    | 10577 (27.6%)                     |
| Unknown/Missing                        | 82 (2.0%)    | 1730 (2.7%)                     | 265 (2.3%)    | 952 (2.5%)                        |

The data presented relates to Cohort 1: singleton pregnancies ending in a live or stillbirth at  $\geq 20+0$  gestation used for analyses of stillbirth and extended perinatal death outcomes.

**Supplementary Table 2: Lag in days between infection (or matching) and end of pregnancy for pregnancies ending in preterm (<37+0 gestation) and very preterm births (<32+0 gestation).**

| Lag from exposure (infection or, for controls, gestation at matching with infected case) | Exposure group | Spontaneous preterm births | Provider-initiated preterm births | Total preterm births (includes preterm births missing delivery onset) |
|------------------------------------------------------------------------------------------|----------------|----------------------------|-----------------------------------|-----------------------------------------------------------------------|
| <b>Preterm births</b>                                                                    |                |                            |                                   |                                                                       |
| 0-6 days                                                                                 | Infected       | 17 (11.4%)                 | 18 (15.1%)                        | 35 (12.8%)                                                            |
|                                                                                          | Uninfected     | 16 (4.4%)                  | 20 (8.1%)                         | 36 (5.9%)                                                             |
| 7-27 days                                                                                | Infected       | 34 (22.8%)                 | 30 (25.2%)                        | 65 (23.7%)                                                            |
|                                                                                          | Uninfected     | 68 (18.8%)                 | 42 (17.1%)                        | 111 (18.2%)                                                           |
| >=28 days                                                                                | Infected       | 98 (65.8%)                 | 71 (59.7%)                        | 174 (63.5%)                                                           |
|                                                                                          | Uninfected     | 277 (76.7%)                | 184 (74.8%)                       | 464 (75.9%)                                                           |
| <b>Very preterm births</b>                                                               |                |                            |                                   |                                                                       |
| 0-6 days                                                                                 | Infected       | 2 (9.1%)                   | 3 (15.0%)                         | 5 (13.2%)                                                             |
|                                                                                          | Uninfected     | 2 (3.9%)                   | 0                                 | 2 (2.9%)                                                              |
| 7-27 days                                                                                | Infected       | 5 (22.7%)                  | 11 (73.3%)                        | 16 (42.1%)                                                            |
|                                                                                          | Uninfected     | 12 (23.5%)                 | 2 (12.5%)                         | 14 (20.6%)                                                            |
| >=28 days                                                                                | Infected       | 15 (68.2%)                 | 1 (6.7%)                          | 17 (44.7%)                                                            |
|                                                                                          | Uninfected     | 37 (72.5%)                 | 14 (87.5%)                        | 52 (76.5%)                                                            |

**Supplementary Table 3: Sub-types of provider-initiated preterm births for Cohort 5.**

|                                                                                             | Infected | Uninfected controls | Vaccinated | Unvaccinated controls |
|---------------------------------------------------------------------------------------------|----------|---------------------|------------|-----------------------|
| Provider-initiated preterm birth                                                            | 119      | 246                 | 233        | 464                   |
| Provider-initiated preterm birth with induction of labour (any subsequent mode of delivery) | 31       | 90                  | 54         | 132                   |
| Provider-initiated preterm birth with pre-labour caesarean section                          | 76       | 151                 | 177        | 324                   |
| Provider-initiated preterm birth type unknown (delivery during critical care admission)     | 12       | 5                   | 2          | 8                     |

**Supplementary Table 4: Comparison between odds ratios (calculated using conditional logistic regression) and risk ratios (calculated using conditional Poisson regression) for the association between exposure to SARS-CoV-2 infection during pregnancy and neonatal and maternal outcomes.**

| Cohort (Outcome)                                        | Infection status | Odds ratio accounting for only matching* [95% CI] | P value* | Adjusted odds ratio** [95% CI] | P value** | Risk ratio accounting for only matching* [95% CI] | P value* | Adjusted risk ratio** [95% CI] | P value** |
|---------------------------------------------------------|------------------|---------------------------------------------------|----------|--------------------------------|-----------|---------------------------------------------------|----------|--------------------------------|-----------|
| <b>Neonatal</b>                                         |                  |                                                   |          |                                |           |                                                   |          |                                |           |
| 1 (Stillbirths)                                         | Infected         | 1.02 [0.55-1.88]                                  | 0.94     | 1.08 [0.56-2.05]               | 0.82      | 1.02 [0.54-1.83]                                  | 0.94     | 1.08 [0.55-2.01]               | 0.81      |
|                                                         | Uninfected       | Ref                                               | -        | Ref                            | -         | Ref                                               | -        | Ref                            | -         |
| 1 (Extended perinatal death)                            | Infected         | 1.13 [0.70-1.82]                                  | 0.62     | 1.13 [0.68-1.89]               | 0.63      | 1.13 [0.69-1.80]                                  | 0.62     | 1.13 [0.67-1.86]               | 0.63      |
|                                                         | Uninfected       | Ref                                               | -        | Ref                            | -         | Ref                                               | -        | Ref                            | -         |
| 2 (Neonatal death)                                      | Infected         | 2.25 [0.95-5.34]                                  | 0.07     | -                              | -         | 2.25 [0.92-5.32]                                  | 0.07     | -                              | -         |
|                                                         | Uninfected       | Ref                                               | -        | -                              | -         | Ref                                               | -        | -                              | -         |
| 3 (Small for gestational age (<10th percentile)***)     | Infected         | 0.91 [0.77-1.08]                                  | 0.26     | 1.04 [0.86-1.26]               | 0.67      | 0.92 [0.77-1.08]                                  | 0.29     | 1.05 [0.87-1.25]               | 0.63      |
|                                                         | Uninfected       | Ref                                               | -        | Ref                            | -         | Ref                                               | -        | Ref                            | -         |
| 3 (Very small for gestational age (<3rd percentile)***) | Infected         | 0.88 [0.61-1.26]                                  | 0.48     | 1.02 [0.65-1.61]               | 0.93      | 0.88 [0.60-1.25]                                  | 0.48     | 1.02 [0.64-1.61]               | 0.92      |
|                                                         | Uninfected       | Ref                                               | -        | Ref                            | -         | Ref                                               | -        | Ref                            | -         |
| 4 (Low Apgar score (<7)***)                             | Infected         | 0.99 [0.74-1.32]                                  | 0.95     | 0.96 [0.71-1.30]               | 0.80      | 0.99 [0.74-1.31]                                  | 0.95     | 0.96 [0.71-1.29]               | 0.81      |
|                                                         | Uninfected       | Ref                                               | -        | Ref                            | -         | Ref                                               | -        | Ref                            | -         |
| 4 (Very low Apgar score (<4)***)                        | Infected         | 0.77 [0.38-1.54]                                  | 0.46     | 0.87 [0.42-1.81]               | 0.72      | 0.77 [0.36-1.48]                                  | 0.46     | 0.87 [0.40-1.76]               | 0.72      |
|                                                         | Uninfected       | Ref                                               | -        | Ref                            | -         | Ref                                               | -        | Ref                            | -         |
| 5 (Preterm birth)                                       | Infected         | 1.37 [1.18-1.59]                                  | <0.001   | 1.36 [1.16-1.59]               | <0.001    | 1.35 [1.17-1.55]                                  | <0.001   | 1.33 [1.14-1.54]               | <0.001    |
|                                                         | Uninfected       | Ref                                               | -        | Ref                            | -         | Ref                                               | -        | Ref                            | -         |
| 5 (Spontaneous preterm birth***)                        | Infected         | 1.25 [1.03-1.52]                                  | 0.03     | 1.27 [1.03-1.56]               | 0.03      | 1.24 [1.02-1.50]                                  | 0.03     | 1.24 [1.01-1.51]               | 0.04      |
|                                                         | Uninfected       | Ref                                               | -        | Ref                            | -         | Ref                                               | -        | Ref                            | -         |
| 5 (Provider-initiated preterm birth***)                 | Infected         | 1.46 [1.17-1.82]                                  | <0.001   | 1.42 [1.11-1.81]               | 0.005     | 1.45 [1.16-1.80]                                  | <0.001   | 1.43 [1.12-1.81]               | 0.004     |
|                                                         | Uninfected       | Ref                                               | -        | Ref                            | -         | Ref                                               | -        | Ref                            | -         |
| 6 (Very preterm birth)                                  | Infected         | 1.68 [1.13-2.49]                                  | 0.01     | 1.90 [1.20-3.02]               | 0.01      | 1.68 [1.12-2.48]                                  | 0.01     | 1.90 [1.19-3.01]               | 0.006     |

|                                              |            |                  |        |                  |        |                  |        |                  |        |
|----------------------------------------------|------------|------------------|--------|------------------|--------|------------------|--------|------------------|--------|
|                                              | Uninfected | Ref              | -      | Ref              | -      | Ref              | -      | Ref              | -      |
| 6 (Spontaneous very preterm birth***)        | Infected   | 1.29 [0.77-2.13] | 0.31   | 1.31 [0.78-2.18] | 0.31   | 1.29 [0.77-2.10] | 0.31   | 1.31 [0.77-2.16] | 0.31   |
|                                              | Uninfected | Ref              | -      | Ref              | -      | Ref              | -      | Ref              | -      |
| 6 (Provider-initiated very preterm birth***) | Infected   | 2.81 [1.39-5.69] | <0.001 | 2.63 [1.23-5.62] | 0.01   | 2.81 [1.38-5.72] | 0.004  | 2.63 [1.22-5.68] | 0.01   |
|                                              | Uninfected | Ref              | -      | Ref              | -      | Ref              | -      | Ref              | -      |
| <b>Maternal</b>                              |            |                  |        |                  |        |                  |        |                  |        |
| 7 (Critical care and/or Death)               | Infected   | 1.83 [1.51-2.21] | <0.001 | 1.72 [1.39-2.12] | <0.001 | 1.80 [1.49-2.17] | <0.001 | 1.69 [1.38-2.08] | <0.001 |
|                                              | Uninfected | Ref              | -      | Ref              | -      | Ref              | -      | Ref              | -      |
| 8 (Venous thromboembolism)                   | Infected   | 2.72 [1.65-4.49] | <0.001 | 2.53 [1.47-4.35] | <0.001 | 2.72 [1.64-4.50] | <0.001 | 2.53 [1.47-4.36] | <0.001 |
|                                              | Uninfected | Ref              | -      | Ref              | -      | Ref              | -      | Ref              | -      |
| 9 (Hypertensive disorders of pregnancy)      | Infected   | 0.85 [0.72-1.01] | 0.06   | 0.82 [0.68-0.98] | 0.03   | 0.86 [0.72-1.01] | 0.07   | 0.82 [0.69-0.98] | 0.03   |
|                                              | Uninfected | Ref              | -      | Ref              | -      | Ref              | -      | Ref              | -      |
| 10 (Pregnancy-related bleeding)              | Infected   | 0.96 [0.90-1.05] | 0.33   | 0.97 [0.90-1.04] | 0.39   | 0.98 [0.93-1.03] | 0.46   | 0.98 [0.93-1.04] | 0.47   |
|                                              | Uninfected | Ref              | -      | Ref              | -      | Ref              | -      | Ref              | -      |

CI=Confidence Interval

\*Matched for maternal age, gestation at infection/matching and seasons of conception and additionally for health board of residence (Greater Glasgow & Clyde or Lanarkshire versus all other health boards) for hypertensive disorders of pregnancy and pregnancy-related bleeding.

\*\*Adjustment for deprivation only for analyses with the following outcomes: spontaneous very preterm birth and provider-initiated very preterm birth. Adjustment for parity and deprivation only for analyses with the following outcomes: stillbirth, extended perinatal death, very low Apgar score and venous thromboembolism. Adjustment for all covariates apart from parity for the following outcomes: preterm birth, spontaneous preterm birth, provider-initiated preterm birth and very preterm birth. Adjustment for all covariates for analyses for the following outcomes: small for gestational age, very small for gestational age, low Apgar score, maternal critical care or death, hypertensive disorders of pregnancy and pregnancy-related bleeding.

\*\*\*For these outcomes there is not an exact match of three uninfected controls to each neonate exposed to infection as neonates with missing outcome data have been removed from analysis; see Supplementary Table 11 for further details on levels of missing data.

**Supplementary Table 5: Association between exposure to SARS-CoV-2 during pregnancy at 6 weeks preconception to ≤19+6 weeks gestation and neonatal and maternal outcomes (reinfections spanning both gestational periods excluded from subgroup analysis), calculated using conditional logistic regression.**

| Cohort                                                 | Infection Status | Number of pregnancies/neonates | Number with outcome | % s with outcome | Odds ratio accounting for only matching [95% CI]* | P value* | Adjusted odds ratio** [95% CI] | P value** |
|--------------------------------------------------------|------------------|--------------------------------|---------------------|------------------|---------------------------------------------------|----------|--------------------------------|-----------|
| <b>Neonatal</b>                                        |                  |                                |                     |                  |                                                   |          |                                |           |
| 1 (Stillbirths)                                        | Infected         | 1269                           | 1                   | 0.08%            | 0.16 [0.02-1.18]                                  | 0.07     | -                              | -         |
|                                                        | Uninfected       | 3807                           | 19                  | 0.5%             | Ref                                               | -        | -                              | -         |
| 1 (Extended perinatal death)                           | Infected         | 1269                           | 4                   | 0.3%             | 0.44 [0.16-1.27]                                  | 0.13     | 0.33 [0.10-1.01]               | 0.05      |
|                                                        | Uninfected       | 3807                           | 27                  | 0.7%             | Ref                                               | -        | Ref                            | -         |
| 2 (Neonatal death)                                     | Infected         | 1268                           | 3                   | 0.2%             | 1.80 [0.43-7.53]                                  | 0.42     | -                              | -         |
|                                                        | Uninfected       | 3804                           | 5                   | 0.1%             | Ref                                               | -        | -                              | -         |
| 3 (Small for gestational age (<10th percentile***)     | Infected         | 1247                           | 58                  | 4.7%             | 0.87 [0.64-1.17]                                  | 0.36     | 1.00 [0.70-1.41]               | 0.98      |
|                                                        | Uninfected       | 3644                           | 195                 | 5.4%             | Ref                                               | -        | Ref                            | -         |
| 3 (Very small for gestational age (<3rd percentile***) | Infected         | 1247                           | 14                  | 1.1%             | 0.98 [0.53-1.79]                                  | 0.94     | 0.89 [0.47-1.69]               | 0.72      |
|                                                        | Uninfected       | 3644                           | 42                  | 1.2%             | Ref                                               | -        | Ref                            | -         |
| 4 (Low Apgar score (<7)***)                            | Infected         | 1156                           | 20                  | 1.8%             | 0.82 [0.49-1.35]                                  | 0.43     | 0.76 [0.44-1.32]               | 0.34      |
|                                                        | Uninfected       | 3342                           | 70                  | 2.0%             | Ref                                               | -        | Ref                            | -         |
| 4 (Very low Apgar score (<3)***)                       | Infected         | 1180                           | 5                   | 0.4%             | 0.83 [0.31-2.26]                                  | 0.72     | -                              | -         |
|                                                        | Uninfected       | 3540                           | 17                  | 0.5%             | Ref                                               | -        | -                              | -         |
| 5 (Preterm birth)                                      | Infected         | 1290                           | 88                  | 6.8%             | 1.21 [0.94-1.56]                                  | 0.15     | 1.15 [0.86-1.53]               | 0.34      |
|                                                        | Uninfected       | 3870                           | 221                 | 5.7%             | Ref                                               | -        | Ref                            | -         |
| 5 (Spontaneous preterm birth***)                       | Infected         | 1287                           | 47                  | 3.7%             | 0.99 [0.70-1.38]                                  | 0.93     | 0.92 [0.63-1.34]               | 0.67      |
|                                                        | Uninfected       | 3858                           | 143                 | 3.7%             | Ref                                               | -        | Ref                            | -         |
| 5 (Provider-initiated preterm birth***)                | Infected         | 1287                           | 38                  | 3.0%             | 1.52 [1.03-2.26]                                  | 0.04     | 1.51 [0.96-2.37]               | 0.07      |
|                                                        | Uninfected       | 3858                           | 75                  | 1.9%             | Ref                                               | -        | Ref                            | -         |
| 6 (Very preterm birth)                                 | Infected         | 1349                           | 13                  | 1.0%             | 1.03 [0.55-1.93]                                  | 0.94     | 0.94 [0.49-1.80]               | 0.84      |
|                                                        | Uninfected       | 4047                           | 38                  | 0.9%             | Ref                                               | -        | Ref                            | -         |
| 6 (Spontaneous very preterm birth***)                  | Infected         | 1348                           | 11                  | 0.8%             | 1.18 [0.59-2.37]                                  | 0.64     | 1.13 [0.55-2.33]               | 0.73      |
|                                                        | Uninfected       | 4043                           | 28                  | 0.7%             | Ref                                               | -        | Ref                            | -         |
| 6 (Provider-initiated very preterm birth***)           | Infected         | 1348                           | 1                   | 0.1%             | 0.33 [0.04-2.63]                                  | 0.30     | -                              | -         |
|                                                        | Uninfected       | 4043                           | 9                   | 0.2%             | Ref                                               | -        | -                              | -         |
| <b>Maternal</b>                                        |                  |                                |                     |                  |                                                   |          |                                |           |
| 7 (Critical care and/or death)                         | Infected         | 1269                           | 24                  | 2.0%             | 0.87 [0.54-1.37]                                  | 0.54     | 0.85 [0.51-1.42]               | 0.54      |
|                                                        | Uninfected       | 3807                           | 83                  | 2.2%             | Ref                                               | -        | Ref                            | -         |
| 8 (Venous thromboembolism)                             | Infected         | 1269                           | 6                   | 0.5%             | 1.50 [0.56-4.00]                                  | 0.42     | -                              | -         |
|                                                        | Uninfected       | 3807                           | 12                  | 0.3%             | Ref                                               | -        | -                              | -         |
| 9 (Hypertensive Disorders of Pregnancy**)              | Infected         | 1268                           | 66                  | 5.2%             | 1.02 [0.77-1.36]                                  | 0.88     | 1.02 [0.75-1.38]               | 0.92      |
|                                                        | Uninfected       | 3804                           | 194                 | 5.1%             | Ref                                               | -        | Ref                            | -         |
| 10 (Pregnancy-related bleeding**)                      | Infected         | 1263                           | 566                 | 44.8%            | 1.00 [0.88-1.13]                                  | 0.96     | 0.98 [0.86-1.12]               | 0.77      |
|                                                        | Uninfected       | 3789                           | 1701                | 44.9%            | Ref                                               | -        | Ref                            | -         |

CI=Confidence Interval

\*Matched for maternal age, gestation at infection/matching and seasons of conception and additionally for health board (Glasgow or Lanarkshire versus all other health boards) for hypertensive disorders of pregnancy and pregnancy-related bleeding.

\*\*Adjustment for deprivation only for analyses with the following outcomes: very preterm birth, spontaneous very preterm birth and provider-initiated very preterm birth. Adjustment for parity and deprivation only for analyses with the following outcomes: extended perinatal death, very small for gestational age and low Apgar score. Adjustment for all covariates for analyses apart from parity for preterm birth, spontaneous preterm birth and provider-initiated preterm birth. Adjustment for all covariates for analyses for the following outcomes: small for gestational age, very small for gestational age, low Apgar score, maternal critical care and/or death, hypertensive disorders of pregnancy and pregnancy-related bleeding.

\*\*\*For these outcomes there is not an exact match of three uninfected controls to each neonate exposed to infection as babies with missing outcome data have been removed from analysis; see Supplementary Table 11 for further details on levels of missing data.

**Supplementary Table 6: Association between exposure to SARS-CoV-2 during pregnancy at ≥20 weeks gestation and neonatal and maternal outcomes (reinfections spanning both gestational periods excluded from subgroup analysis), calculated using conditional logistic regression.**

| Cohort                                                  | Infection status | Number of neonates | Number with outcome | % with outcome | Odds ratio accounting for only matching* [95% CI] | P value* | Adjusted odds ratio** [95% CI] | P value** |
|---------------------------------------------------------|------------------|--------------------|---------------------|----------------|---------------------------------------------------|----------|--------------------------------|-----------|
| <b>Neonatal</b>                                         |                  |                    |                     |                |                                                   |          |                                |           |
| 1 (Stillbirths)                                         | Infected         | 2774               | 13                  | 0.5%           | 1.86 [0.93-3.71]                                  | 0.08     | 2.01 [0.92-4.39]               | 0.08      |
|                                                         | Uninfected       | 8322               | 21                  | 0.3%           | Ref                                               | -        | Ref                            | -         |
| 1 (Extended perinatal death)                            | Infected         | 2774               | 19                  | 0.7%           | 1.73 [0.98-3.04]                                  | 0.06     | 1.77 [0.95-3.31]               | 0.07      |
|                                                         | Uninfected       | 8322               | 33                  | 0.4%           | Ref                                               | -        | Ref                            | -         |
| 2 (Neonatal death)                                      | Infected         | 2761               | 6                   | 0.2%           | 2.57 [0.86-7.65]                                  | 0.09     | -                              | -         |
|                                                         | Uninfected       | 8283               | 7                   | 0.1%           | Ref                                               | -        | -                              | -         |
| 3 (Small for gestational age (<10th percentile)***)     | Infected         | 2758               | 127                 | 4.6%           | 0.95 [0.77-1.16]                                  | 0.61     | 1.10 [0.87-1.38]               | 0.43      |
|                                                         | Uninfected       | 8274               | 410                 | 5.0%           | Ref                                               | -        | Ref                            | -         |
| 3 (Very small for gestational age (<3rd percentile)***) | Infected         | 2758               | 24                  | 0.9%           | 0.84 [0.53-1.32]                                  | 0.45     | 1.05 [0.56-1.92]               | 0.87      |
|                                                         | Uninfected       | 8274               | 89                  | 1.1%           | Ref                                               | -        | Ref                            | -         |
| 4 (Low Apgar score (<7)***)                             | Infected         | 2576               | 44                  | 1.7%           | 1.10 [0.77-1.56]                                  | 0.61     | 1.05 [0.72-1.54]               | 0.80      |
|                                                         | Uninfected       | 7728               | 117                 | 1.5%           | Ref                                               | -        | Ref                            | -         |
| 4 (Very low Apgar score (<3)***)                        | Infected         | 2576               | 5                   | 0.2%           | 0.71 [0.27-1.90]                                  | 0.50     | -                              | -         |
|                                                         | Uninfected       | 7728               | 20                  | 0.3%           | Ref                                               | -        | -                              | -         |
| 5 (Preterm birth)                                       | Infected         | 2325               | 188                 | 8.1%           | 1.46 [1.22-1.75]                                  | <0.001   | 1.46 [1.20-1.77]               | <0.001    |
|                                                         | Uninfected       | 6975               | 394                 | 5.7%           | Ref                                               | -        | Ref                            | -         |
| 5 (Spontaneous preterm birth***)                        | Infected         | 2322               | 105                 | 4.5%           | 1.46 [1.15-1.86]                                  | 0.002    | 1.50 [1.16-1.94]               | 0.002     |
|                                                         | Uninfected       | 6964               | 219                 | 3.1%           | Ref                                               | -        | Ref                            | -         |
| 5 (Provider-initiated preterm birth***)                 | Infected         | 2322               | 80                  | 3.4%           | 1.40 [1.07-1.83]                                  | 0.01     | 1.37 [1.01-1.84]               | 0.04      |
|                                                         | Uninfected       | 6964               | 173                 | 2.5%           | Ref                                               | -        | Ref                            | -         |
| 6 (Very preterm birth)                                  | Infected         | 1486               | 25                  | 1.7%           | 2.50 [1.47-4.25]                                  | <0.001   | 2.59 [1.47-4.56]               | <0.001    |
|                                                         | Uninfected       | 4458               | 30                  | 0.7%           | Ref                                               | -        | Ref                            | -         |
| 6 (Spontaneous very preterm birth***)                   | Infected         | 1486               | 11                  | 0.7%           | 1.44 [0.70-2.94]                                  | 0.33     | 1.51 [0.71-3.22]               | 0.28      |
|                                                         | Uninfected       | 4458               | 23                  | 0.5%           | Ref                                               | -        | Ref                            | -         |
| 6 (Provider-initiated very preterm birth***)            | Infected         | 1486               | 14                  | 0.9%           | 6.00 [2.42-14.87]                                 | <0.001   | -                              | -         |
|                                                         | Uninfected       | 4458               | 7                   | 0.2%           | Ref                                               | -        | -                              | -         |
| <b>Maternal</b>                                         |                  |                    |                     |                |                                                   |          |                                |           |
| 7 (Critical care and/or death)                          | Infected         | 2774               | 150                 | 5.4%           | 2.26 [1.82-2.80]                                  | <0.001   | 2.12 [1.67-2.69]               | <0.001    |
|                                                         | Uninfected       | 8322               | 204                 | 2.5%           | Ref                                               | -        | Ref                            | -         |
| 8 (Venous thromboembolism)                              | Infected         | 2772               | 23                  | 0.8%           | 3.45 [1.90-6.28]                                  | <0.001   | 2.94 [1.53-5.63]               | 0.001     |
|                                                         | Uninfected       | 8316               | 20                  | 0.2%           | Ref                                               | -        | Ref                            | -         |
| 9 (Hypertensive Disorders of Pregnancy**)               | Infected         | 2772               | 110                 | 4.0%           | 0.77 [0.62-0.95]                                  | 0.02     | 0.73 [0.58-0.92]               | 0.01      |
|                                                         | Uninfected       | 8316               | 423                 | 5.1%           | Ref                                               | -        | Ref                            | -         |
| 10 (Pregnancy-related bleeding**)                       | Infected         | 2679               | 1085                | 40.5%          | 0.95 [0.87-1.03]                                  | 0.22     | 0.96 [0.88-1.06]               | 0.44      |

|  |            |      |      |       |     |   |     |   |
|--|------------|------|------|-------|-----|---|-----|---|
|  | Uninfected | 8037 | 3365 | 41.9% | Ref | - | Ref | - |
|--|------------|------|------|-------|-----|---|-----|---|

CI=Confidence Interval

\*Matched for maternal age, gestation at infection/matching and seasons of conception and additionally for health board (Glasgow or Lanarkshire versus all other health boards) for hypertensive disorders of pregnancy and pregnancy-related bleeding.

\*\*Adjustment for deprivation only for analyses with the following outcomes: very preterm birth, spontaneous very preterm birth and provider-initiated very preterm birth. Adjustment for parity and deprivation only for analyses with the following outcomes: stillbirth, extended perinatal death and venous thromboembolism. Adjustment for all covariates for analyses apart from parity for preterm birth, spontaneous preterm birth and provider-initiated preterm birth. Adjustment for all covariates for analyses for the following outcomes: small for gestational age, very small for gestational age, low Apgar score maternal critical care and/or death, hypertensive disorders of pregnancy and pregnancy-related bleeding.

\*\*\*For these outcomes there is not an exact match of three uninfected controls to each neonate exposed to infection as neonates with missing outcome data have been removed from analysis; see Supplementary Table 11 for further details on levels of missing data.



**Supplementary Table 7: Association between SARS-CoV-2 infection and hypertension/bleeding outcomes, stratified by health board of residence, calculated using conditional logistic regression.**

| Outcome                             | Health Board of residence                   | Infection Status | Number of neonates | Number with outcome | % with outcome | Odds ratio accounting for only matching* [95% CI] | P value* | Adjusted odds ratio** [95% CI] | P value** |
|-------------------------------------|---------------------------------------------|------------------|--------------------|---------------------|----------------|---------------------------------------------------|----------|--------------------------------|-----------|
| Hypertensive Disorders of Pregnancy | NHS Greater Glasgow & Clyde/NHS Lanarkshire | Infected         | 1885               | 83                  | 4.4%           | 0.93 [0.73-1.21]                                  | 0.61     | 0.87 [0.66-1.14]               | 0.31      |
|                                     |                                             | Uninfected       | 5655               | 265                 | 4.7%           | Ref                                               | -        | Ref                            | -         |
|                                     | All other health boards                     | Infected         | 2186               | 95                  | 4.3%           | 0.78 [0.62-0.99]                                  | <0.05    | 0.80 [0.62-1.02]               | 0.07      |
|                                     |                                             | Uninfected       | 6558               | 359                 | 5.5%           | Ref                                               | -        | Ref                            | -         |
| Pregnancy-related bleeding          | NHS Greater Glasgow & Clyde/NHS Lanarkshire | Infected         | 1823               | 823                 | 45.1%          | 0.95 [0.85-1.05]                                  | 0.32     | 0.93 [0.83-1.03]               | 0.16      |
|                                     |                                             | Uninfected       | 5469               | 2543                | 46.5%          | Ref                                               | -        | Ref                            | -         |
|                                     | All other health boards                     | Infected         | 2150               | 842                 | 39.2%          | 0.98 [0.89-1.08]                                  | 0.69     | 1.01 [0.91-1.12]               | 0.88      |
|                                     |                                             | Uninfected       | 6450               | 2558                | 39.7%          | Ref                                               | -        | Ref                            | -         |

CI=Confidence Interval

\*Matched for maternal age, gestation at infection/matching and seasons of conception.

\*\*Adjustment for all covariates for both maternal outcomes.

**Supplementary Table 8: Association between vaccination and hypertension/bleeding outcomes stratified by health board, calculated using conditional logistic regression.**

| Outcome                             | Health board                                | Vaccination Status      | Number of neonates | Number with outcome | % with outcome | Odds ratio accounting for only matching* [95% CI] | P value*         | Adjusted odds ratio** [95% CI] | P value**        |
|-------------------------------------|---------------------------------------------|-------------------------|--------------------|---------------------|----------------|---------------------------------------------------|------------------|--------------------------------|------------------|
| Hypertensive Disorders of Pregnancy | NHS Greater Glasgow & Clyde/NHS Lanarkshire | Vaccinated              | 3620               | 178                 | 4.9%           | 1.01 [0.84-1.22]                                  | 0.92             | 0.89 [0.72-1.09]               | 0.27             |
|                                     |                                             | Unvaccinated            | 7240               | 353                 | 4.9%           | Ref                                               | -                | Ref                            | -                |
|                                     |                                             | All other health boards | Vaccinated         | 7753                | 460            | 5.9%                                              | 0.99 [0.88-1.11] | 0.83                           | 0.89 [0.79-1.01] |
|                                     |                                             | Unvaccinated            | 15506              | 931                 | 6.0%           | Ref                                               | -                | Ref                            | -                |
| Pregnancy-related bleeding          | NHS Greater Glasgow & Clyde/NHS Lanarkshire | Vaccinated              | 3557               | 1771                | 49.7%          | 1.06 [0.98-1.15]                                  | 0.14             | 0.99 [0.91-1.08]               | 0.89             |
|                                     |                                             | Unvaccinated            | 7114               | 3436                | 48.3%          | Ref                                               | -                | Ref                            | -                |
|                                     |                                             | All other health boards | Vaccinated         | 7673                | 3424           | 44.6%                                             | 1.11 [1.05-1.17] | <.001                          | 1.06 [1.00-1.12] |
|                                     |                                             | Unvaccinated            | 15346              | 6464                | 42.1%          | Ref                                               | -                | Ref                            | -                |

\*Matched for maternal age, gestation at infection/matching and seasons of conception.

\*\*Adjustment for all covariates for both maternal outcomes.

**Supplementary Table 9: Comparison between odds ratios (calculated using conditional logistic regression) and risk ratios (calculated using conditional Poisson regression) for the association between exposure to COVID-19 vaccination during pregnancy and neonatal and maternal outcomes.**

| Cohort (Outcome)                                                    | Vaccination status | Odds ratio accounting for only matching* [95% CI] | P value* | Adjusted odds ratio** [95% CI] | P value** | Risk ratio accounting for only matching* [95% CI] | P value* | Adjusted risk ratio** [95% CI] | P value** |
|---------------------------------------------------------------------|--------------------|---------------------------------------------------|----------|--------------------------------|-----------|---------------------------------------------------|----------|--------------------------------|-----------|
| <b>Neonatal</b>                                                     |                    |                                                   |          |                                |           |                                                   |          |                                |           |
| 1 (Stillbirths)                                                     | Vaccinated         | 1.08 [0.68-1.70]                                  | 0.75     | 1.03 [0.63-1.68]               | 0.91      | 1.07 [0.68-1.67]                                  | 0.76     | 1.04 [0.64-1.68]               | 0.86      |
|                                                                     | Unvaccinated       | Ref                                               | -        | Ref                            | -         | Ref                                               | -        | Ref                            | -         |
| 1 (Extended perinatal death)                                        | Vaccinated         | 0.92 [0.63-1.34]                                  | 0.66     | 0.97 [0.64-1.48]               | 0.90      | 0.92 [0.63-1.32]                                  | 0.66     | 0.98 [0.64-1.48]               | 0.93      |
|                                                                     | Unvaccinated       | Ref                                               | -        | Ref                            | -         | Ref                                               | -        | Ref                            | -         |
| 2 (Neonatal death)                                                  | Vaccinated         | 0.56 [0.29-1.06]                                  | 0.07     | 0.51 [0.26-1.01]               | 0.05      | 0.56 [0.28-1.02]                                  | 0.07     | 0.51 [0.25-0.98]               | 0.05      |
|                                                                     | Unvaccinated       | Ref                                               | -        | Ref                            | -         | Ref                                               | -        | -                              | -         |
| 3 (Small for gestational age (<10 <sup>th</sup> percentile)***)     | Vaccinated         | 0.89 [0.79-0.99]                                  | 0.04     | 1.02 [0.90-1.16]               | 0.79      | 0.89 [0.80-1.00]                                  | 0.04     | 1.01 [0.90-1.15]               | 0.81      |
|                                                                     | Unvaccinated       | Ref                                               | -        | Ref                            | -         | Ref                                               | -        | Ref                            | -         |
| 3 (Very small for gestational age (<3 <sup>rd</sup> percentile)***) | Vaccinated         | 0.90 [0.71-1.14]                                  | 0.40     | 1.06 [0.81-1.40]               | 0.66      | 0.90 [0.71-1.14]                                  | 0.40     | 1.07 [0.81-1.40]               | 0.63      |
|                                                                     | Unvaccinated       | Ref                                               | -        | Ref                            | -         | Ref                                               | -        | Ref                            | -         |
| 4 (Low Apgar score (<7)***)                                         | Vaccinated         | 1.08 [0.90-1.30]                                  | 0.41     | 1.13 [0.93-1.37]               | 0.23      | 1.08 [0.90-1.30]                                  | 0.41     | 1.13 [0.92-1.37]               | 0.24      |
|                                                                     | Unvaccinated       | Ref                                               | -        | Ref                            | -         | Ref                                               | -        | Ref                            | -         |
| 4 (Very low Apgar score (<4)***)                                    | Vaccinated         | 1.11 [0.68-1.80]                                  | 0.67     | 1.32 [0.79-2.23]               | 0.29      | 1.11 [0.67-1.79]                                  | 0.67     | 1.33 [0.78-2.23]               | 0.29      |
|                                                                     | Unvaccinated       | Ref                                               | -        | Ref                            | -         | Ref                                               | -        | Ref                            | -         |
| 5 (Preterm birth)                                                   | Vaccinated         | 0.93 [0.84-1.03]                                  | 0.15     | 0.96 [0.86-1.06]               | 0.41      | 0.93 [0.85-1.03]                                  | 0.16     | 0.95 [0.86-1.06]               | 0.38      |
|                                                                     | Unvaccinated       | Ref                                               | -        | Ref                            | -         | Ref                                               | -        | Ref                            | -         |
| 5 (Spontaneous preterm birth***)                                    | Vaccinated         | 0.89 [0.79-1.01]                                  | 0.08     | 0.95 [0.83-1.08]               | 0.43      | 0.90 [0.79-1.01]                                  | 0.09     | 0.95 [0.83-1.08]               | 0.42      |
|                                                                     | Unvaccinated       | Ref                                               | -        | Ref                            | -         | Ref                                               | -        | Ref                            | -         |
| 5 (Provider-initiated preterm birth***)                             | Vaccinated         | 1.00 [0.86-1.18]                                  | 0.97     | 0.95 [0.79-1.13]               | 0.55      | 1.00 [0.86-1.17]                                  | 0.97     | 0.94 [0.79-1.12]               | 0.51      |
|                                                                     | Unvaccinated       | Ref                                               | -        | Ref                            | -         | Ref                                               | -        | Ref                            | -         |
| 6 (Very preterm birth)                                              | Vaccinated         | 0.88 [0.67-1.16]                                  | 0.36     | 0.89 [0.64-1.23]               | 0.47      | 0.88 [0.67-1.15]                                  | 0.36     | 0.89 [0.64-1.22]               | 0.47      |
|                                                                     | Unvaccinated       | Ref                                               | -        | Ref                            | -         | Ref                                               | -        | Ref                            | -         |

|                                              |              |                  |        |                  |      |                  |       |                  |      |
|----------------------------------------------|--------------|------------------|--------|------------------|------|------------------|-------|------------------|------|
|                                              | Unvaccinated | Ref              | -      | Ref              | -    | Ref              | -     | Ref              | -    |
| 6 (Spontaneous very preterm birth***)        | Vaccinated   | 0.93 [0.68-1.28] | 0.67   | 0.92 [0.63-1.35] | 0.67 | 0.93 [0.68-1.27] | 0.67  | 0.92 [0.62-1.35] | 0.68 |
|                                              | Unvaccinated | Ref              | -      | Ref              | -    | Ref              | -     | Ref              | -    |
| 6 (Provider-initiated very preterm birth***) | Vaccinated   | 0.58 [0.31-1.07] | 0.08   | 0.69 [0.35-1.28] | 0.22 | 0.58 [0.30-1.04] | 0.08  | 0.67 [0.34-1.25] | 0.22 |
|                                              | Unvaccinated | Ref              | -      | Ref              | -    | Ref              | -     | Ref              | -    |
| <b>Maternal</b>                              |              |                  |        |                  |      |                  |       |                  |      |
| 7 (Critical care and/or Death)               | Vaccinated   | 0.92 [0.79-1.07] | 0.26   | 0.86 [0.73-1.01] | 0.07 | 0.92 [0.79-1.06] | 0.26  | 0.86 [0.73-1.01] | 0.07 |
|                                              | Unvaccinated | Ref              | -      | Ref              | -    | Ref              | -     | Ref              | -    |
| 8 (Venous thromboembolism)                   | Vaccinated   | 0.60 [0.35-1.04] | 0.07   | 0.62 [0.35-1.09] | 0.10 | 0.61 [0.34-1.02] | 0.07  | 0.63 [0.35-1.07] | 0.10 |
|                                              | Unvaccinated | Ref              | -      | Ref              | -    | Ref              | -     | Ref              | -    |
| 9 (Hypertensive disorders of pregnancy)      | Vaccinated   | 0.99 [0.90-1.10] | 0.89   | 0.89 [0.80-0.99] | 0.04 | 0.99 [0.90-1.09] | 0.90  | 0.90 [0.82-1.00] | 0.05 |
|                                              | Unvaccinated | Ref              | -      | Ref              | -    | Ref              | -     | Ref              | -    |
| 10 (Pregnancy-related bleeding)              | Vaccinated   | 1.09 [1.04-1.14] | <0.001 | 1.04 [0.99-1.09] | 0.14 | 1.05 [1.01-1.09] | 0.005 | 1.02 [0.99-1.06] | 0.25 |
|                                              | Unvaccinated | Ref              | -      | Ref              | -    | Ref              | -     | Ref              | -    |

CI=Confidence Interval

\*Matched for maternal age and gestation at vaccination/matching and additionally for health board of residence (Greater Glasgow & Clyde or Lanarkshire versus all other health boards) for hypertensive disorders of pregnancy and pregnancy-related bleeding.

\*\*Adjustment for deprivation only for analyses with the following outcomes: provider-initiated very preterm birth. Adjustment for parity and deprivation only for analyses with the following outcomes: stillbirth, neonatal death, very low Apgar score and venous thromboembolism. Adjustment for all covariates apart from parity for the following outcomes: preterm birth, spontaneous preterm birth, provider-initiated preterm birth, very preterm birth, and spontaneous very preterm birth. Adjustment for all covariates for analyses for the following outcomes: extended perinatal death, small for gestational age, very small for gestational age, low Apgar score, maternal critical care or death, hypertensive disorders of pregnancy and pregnancy-related bleeding.

\*\*\*For these outcomes there is not an exact match of two unvaccinated controls to each neonate exposed to vaccination as neonates with missing outcome data have been removed from analysis; see Supplementary Table 11 for further details on levels of missing data.

**Supplementary Table 10: ICD-10 codes and critical care admission codes (drawn from the Scottish Intensive Care Society Audit Group [SICSAG] dataset) used to identify hypertensive disorders of pregnancy, pregnancy-related bleeding, and venous thromboembolism.**

| Outcome                                    |               | Condition                                                                 |
|--------------------------------------------|---------------|---------------------------------------------------------------------------|
| <b>Hypertensive disorders of pregnancy</b> | <b>ICD-10</b> |                                                                           |
|                                            | O11           | Pre-eclampsia superimposed on chronic hypertension                        |
|                                            | O13           | Gestational [pregnancy-induced] hypertension                              |
|                                            | O14.0         | Mild to moderate pre-eclampsia                                            |
|                                            | O14.1         | Severe pre-eclampsia                                                      |
|                                            | O14.2         | HELLP syndrome                                                            |
|                                            | O14.9         | Pre-eclampsia, unspecified                                                |
|                                            | O15.0         | Eclampsia in pregnancy                                                    |
|                                            | O15.1         | Eclampsia in labour                                                       |
|                                            | O15.2         | Eclampsia in the puerperium                                               |
|                                            | O15.9         | Eclampsia, unspecified as to time period                                  |
|                                            | O16           | Unspecified maternal hypertension                                         |
|                                            | <b>SICSAG</b> |                                                                           |
|                                            | 217           | Pregnancy induced hypertension                                            |
|                                            | 215           | Pre-eclampsia                                                             |
|                                            | 216           | Pre-eclampsia/eclampsia                                                   |
|                                            | 99            | HELLP syndrome                                                            |
|                                            | 74            | Eclampsia                                                                 |
|                                            | 107           | Hypertension                                                              |
|                                            | 167           | Other hypertension                                                        |
| <b>Pregnancy-related bleeding</b>          |               | <i>Obstetric haemorrhage</i>                                              |
|                                            | <b>ICD-10</b> |                                                                           |
|                                            | O44.1         | Placenta praevia with haemorrhage                                         |
|                                            | O45.0         | Premature separation of placenta with coagulation defect                  |
|                                            | O45.8         | Other premature separation of placenta                                    |
|                                            | O45.9         | Premature separation of placenta, unspecified                             |
|                                            | O46.0         | Antepartum haemorrhage with coagulation defect                            |
|                                            | O46.8         | Other antepartum haemorrhage                                              |
|                                            | O46.9         | Antepartum haemorrhage, unspecified                                       |
|                                            | O67.0         | Intrapartum haemorrhage with coagulation defect                           |
|                                            | O67.8         | Other intrapartum haemorrhage                                             |
|                                            | O67.9         | Intrapartum haemorrhage, unspecified                                      |
|                                            | O69.4         | Labour and delivery complicated by haemorrhage from vasa praevia          |
|                                            | O72.0         | Third stage haemorrhage                                                   |
|                                            | O72.1         | Other immediate postpartum haemorrhage                                    |
|                                            | O72.2         | Delayed and secondary postpartum haemorrhage                              |
|                                            | O72.3         | Postpartum coagulation defects                                            |
|                                            | <b>SICSAG</b> |                                                                           |
|                                            | 20            | Antepartum haemorrhage                                                    |
|                                            | 199           | Peripartum haemorrhage                                                    |
|                                            | 214           | Postpartum haemorrhage                                                    |
|                                            | 114           | Hysterectomy                                                              |
|                                            | 113           | Hypovolaemic/haemorrhagic shock                                           |
|                                            | 33            | Bleeding-laceration/tear                                                  |
|                                            |               | <i>Early pregnancy bleeding</i>                                           |
|                                            | <b>ICD-10</b> |                                                                           |
|                                            | O03.1         | Incomplete spontaneous abortion (miscarriage), complicated by haemorrhage |

|                               |               |                                                                                     |
|-------------------------------|---------------|-------------------------------------------------------------------------------------|
|                               | O03.6         | Complete spontaneous abortion (miscarriage), complicated by haemorrhage             |
|                               | O04.1         | Incomplete medical abortion (TOP), complicated by haemorrhage                       |
|                               | O04.6         | Complete medical abortion (TOP), complicated by haemorrhage                         |
|                               | O05.1         | Incomplete other abortion, complicated by haemorrhage                               |
|                               | O05.6         | Complete other abortion, complicated by haemorrhage                                 |
|                               | O06.1         | Incomplete unspecified abortion, complicated by haemorrhage                         |
|                               | O06.6         | Complete unspecified abortion, complicated by haemorrhage                           |
|                               | O07.1         | Failed medical abortion, complicated by haemorrhage                                 |
|                               | O07.6         | Other and unspecified failed medical abortion, complicated by haemorrhage           |
|                               | O08.1         | Delayed or excessive haemorrhage following abortion and ectopic and molar pregnancy |
|                               | O20.0         | Threatened abortion                                                                 |
|                               | O20.8         | Other haemorrhage in early pregnancy                                                |
|                               | O20.9         | Haemorrhage in early pregnancy, unspecified                                         |
|                               | <b>SICSAG</b> |                                                                                     |
|                               | 75            | Ectopic pregnancy                                                                   |
|                               |               | <b><i>Disseminated intravascular coagulation</i></b>                                |
|                               | <b>ICD-10</b> |                                                                                     |
|                               | D65           | Disseminated intravascular coagulation                                              |
|                               | <b>SICSAG</b> |                                                                                     |
|                               | 70            | Disseminated intravascular coagulation                                              |
| <b>Venous thromboembolism</b> | <b>ICD-10</b> |                                                                                     |
|                               | I26.0         | Pulmonary embolism with mention of acute cor pulmonale                              |
|                               | I26.9         | Pulmonary embolism without mention of acute cor pulmonale                           |
|                               | I80.1         | Phlebitis and thrombophlebitis of femoral vein                                      |
|                               | I80.2         | Phlebitis and thrombophlebitis of other deep vessels of lower extremities           |
|                               | I80.3         | Phlebitis and thrombophlebitis of lower extremities, unspecified                    |
|                               | O08.2         | Embolism following abortion and ectopic and molar pregnancy                         |
|                               | O22.3         | Deep thrombophlebitis in pregnancy                                                  |
|                               | O87.1         | Deep phlebothrombosis in the puerperium                                             |
|                               | O88.2         | Obstetric blood-clot embolism                                                       |
|                               | I80.8         | Phlebitis and thrombophlebitis of other sites                                       |
|                               | I80.9         | Phlebitis and thrombophlebitis of unspecified site                                  |
|                               | I81           | Portal vein thrombosis                                                              |
|                               | I82.0         | Budd Chiari syndrome                                                                |
|                               | I82.1         | Thrombophlebitis migrans                                                            |
|                               | I82.2         | Embolism and thrombosis of vena cava                                                |
|                               | I82.3         | Embolism and thrombosis of renal vein                                               |
|                               | I82.8         | Embolism and thrombosis of other specified veins                                    |
|                               | I82.9         | Embolism and thrombosis of unspecified vein                                         |
|                               | O22.9         | Venous complication in pregnancy, unspecified                                       |
|                               | O87.9         | Venous complication in the puerperium, unspecified                                  |
|                               | G08           | Intracranial and intraspinal phlebitis and thrombophlebitis                         |
|                               | I63.6         | Cerebral infarction due to cerebral venous thrombosis, nonpyogenic                  |
|                               | I67.6         | Nonpyogenic thrombosis of intracranial venous system                                |
|                               | O22.5         | Cerebral venous thrombosis in pregnancy                                             |
|                               | O87.3         | Cerebral venous thrombosis in the puerperium                                        |
|                               | <b>SICSAG</b> |                                                                                     |
|                               | 219           | Pulmonar embolus                                                                    |
|                               | 220           | Pulmonary embolism                                                                  |
|                               | 221           | Pulmonary embolus                                                                   |
|                               | 225           | Pulmonary thromboembolism                                                           |
|                               | 275           | Venous thrombosis (including DVT)                                                   |
|                               | 261           | Thrombotic disorders                                                                |
|                               | 219           | Pulmonar embolus                                                                    |

**Supplementary Table 11: Missing outcome data in matched cohorts.**

| Outcome                                                                  | Infected |                              | Uninfected |                              | Vaccinated |                              | Unvaccinated |                              |
|--------------------------------------------------------------------------|----------|------------------------------|------------|------------------------------|------------|------------------------------|--------------|------------------------------|
|                                                                          | Total    | Number (%) with missing data | Total      | Number (%) with missing data | Total      | Number (%) with missing data | Total        | Number (%) with missing data |
| Small for Gestational Age                                                | 4,057    | 110 (2.7%)                   | 12,171     | 318 (2.6%)                   | 11,388     | 387 (3.4%)                   | 22,676       | 660 (2.9%)                   |
| Apgar Score                                                              | 3,786    | 123 (3.2%)                   | 11,358     | 410 (3.6%)                   | 10,752     | 466 (4.3%)                   | 21,504       | 848 (3.9%)                   |
| Provider-initiated preterm birth AND spontaneous preterm birth           | 3,603    | 6 (0.2%)                     | 10,809     | 4 (0.04%)                    | 11,202     | 9 (0.1%)                     | 22,404       | 24 (0.1%)                    |
| Provider-initiated very preterm birth AND spontaneous very preterm birth | 2,842    | 1 (0.04%)                    | 8,526      | 1 (0.01%)                    | 10,057     | 5 (0.05%)                    | 20,114       | 3 (0.02%)                    |

| Completed and ongoing pregnancies [neonates] from Jan 01, 2015 to July 13, 2022<br>N=575,272 [581,370]                                                                                                                                                                                                                                                                                                                                                                                                  |                                                                                                                                                                                             |                                                                                    |                                                                                                                                                                        |
|---------------------------------------------------------------------------------------------------------------------------------------------------------------------------------------------------------------------------------------------------------------------------------------------------------------------------------------------------------------------------------------------------------------------------------------------------------------------------------------------------------|---------------------------------------------------------------------------------------------------------------------------------------------------------------------------------------------|------------------------------------------------------------------------------------|------------------------------------------------------------------------------------------------------------------------------------------------------------------------|
| <b>Excluded pregnancies [neonates]*</b><br>Completed pregnancies with unknown outcome=5,737 [5,738]<br>Pregnancies ending before 20 weeks gestation, terminations and ongoing pregnancies=192,620 [192,724]<br>Pregnancies conceived ≥June 2, 2021 [could not reach 40+6 weeks gestation by February 28, 2022]=16,941 [17,241]<br>Pre-pandemic period pregnancies ending <1 March 2020=267,532 [271,840]<br>Pregnancies completed by May 18, 2020= 9,781 [9,931]<br>Multiple pregnancies= 1,220 [2,455] |                                                                                                                                                                                             |                                                                                    |                                                                                                                                                                        |
| Pandemic widespread testing period singleton neonates/pregnancies<br>N=81,441                                                                                                                                                                                                                                                                                                                                                                                                                           |                                                                                                                                                                                             |                                                                                    |                                                                                                                                                                        |
| Cohort name (outcomes)                                                                                                                                                                                                                                                                                                                                                                                                                                                                                  | Cohort exclusion criteria (number excluded)                                                                                                                                                 | Final matched cohort numbers**                                                     | Final analysis numbers for matched cohorts with missing outcome data***                                                                                                |
| <b>Cohort 1</b><br><i>Stillbirth</i><br><i>Extended perinatal mortality</i>                                                                                                                                                                                                                                                                                                                                                                                                                             | Neonates of mothers vaccinated in exposure period (N=12,808)†                                                                                                                               | Infected=4,074<br>Uninfected pool=64,559<br><i>Uninfected controls=12,222</i>      | -                                                                                                                                                                      |
| <b>Cohort 2</b><br><i>Neonatal death</i>                                                                                                                                                                                                                                                                                                                                                                                                                                                                | Neonates of mothers vaccinated in exposure period (N=12,808)<br>Stillbirths (N=221)                                                                                                         | Infected=4,060<br>Uninfected pool=64,352<br><i>Uninfected controls=12,180</i>      | -                                                                                                                                                                      |
| <b>Cohort 3</b><br><i>Small for gestational age</i><br><i>Very small for gestational age</i>                                                                                                                                                                                                                                                                                                                                                                                                            | Neonates of mothers vaccinated in exposure period (N=12,808)<br>Stillbirths (N=221)<br>Neonates<23 or >42 weeks gestation (N=46)                                                            | Infected=4,057<br>Uninfected pool=64,309<br><i>Uninfected controls=12,171</i>      | Infected=3,947<br>(110 missing data)<br><i>Uninfected controls=11,532</i><br>(639 missing data or controls of infected neonates missing data)                          |
| <b>Cohort 4</b><br><i>Low Apgar score</i><br><i>Very low Apgar score</i>                                                                                                                                                                                                                                                                                                                                                                                                                                | Neonates of mothers vaccinated in exposure period (N=12,808)<br>Stillbirths (N=221)<br>Neonates<37 weeks gestation (N=4,142)                                                                | Infected=3,786<br>Uninfected pool=60,484<br><i>Uninfected controls=11,358</i>      | Infected=3,663<br>(123 missing data)<br><i>Uninfected controls =10,594</i><br>(764 missing data or controls of infected neonates missing data)                         |
| <b>Cohort 5</b><br><i>Any preterm birth</i><br><i>Spontaneous preterm birth</i><br><i>Provider-initiated preterm birth</i>                                                                                                                                                                                                                                                                                                                                                                              | Neonates≥37 weeks gestation at start of widespread testing (N=2,163)<br>Neonates of mothers vaccinated in exposure period (N=12,424)<br>Stillbirths (N=216)                                 | Infected=3,603<br>Uninfected pool=63,035<br><i>Uninfected controls=10,809</i>      | Infected=3,597<br>(6 missing delivery onset)****<br><i>Uninfected controls=10,787</i><br>(22 missing delivery onset or controls of infected neonates missing data)**** |
| <b>Cohort 6</b><br><i>Very preterm birth</i><br><i>Spontaneous very preterm birth</i><br><i>Provider-initiated very preterm birth</i>                                                                                                                                                                                                                                                                                                                                                                   | Neonates≥32 weeks gestation at start of widespread testing (N=6,580)<br>Neonates of mothers vaccinated in exposure period (N=10,855)<br>Stillbirths (N=213)                                 | Infected=2,842<br>Uninfected pool=60,951<br><i>Uninfected controls=8,526</i>       | Infected=2,481<br>(1 missing delivery onset)****<br><i>Uninfected controls=8,522</i><br>(4 missing delivery onset or controls of infected neonates missing data)****   |
| <b>Cohort 7</b><br><i>Critical care admission or death</i>                                                                                                                                                                                                                                                                                                                                                                                                                                              | Pregnancies where mother was vaccinated in exposure period (N=12,808)                                                                                                                       | Infected=4,074<br>Uninfected pool=64,559<br><i>Uninfected controls=12,222</i>      | -                                                                                                                                                                      |
| <b>Cohort 8</b><br><i>Venous thromboembolism</i>                                                                                                                                                                                                                                                                                                                                                                                                                                                        | Pregnancies where mother was vaccinated in exposure period (N=12,808)<br>Pregnancies with venous thromboembolism diagnosis before first infection date in exposure period (N=2)             | Infected=4,072<br>Uninfected pool=64,559<br><i>Uninfected controls=12,216*****</i> | -                                                                                                                                                                      |
| <b>Cohort 9</b><br><i>Hypertensive disorders of pregnancy</i>                                                                                                                                                                                                                                                                                                                                                                                                                                           | Pregnancies where mother was vaccinated in exposure period (N=12,808)<br>Pregnancies with hypertensive disorder of pregnancy diagnosis before first infection date in exposure period (N=3) | Infected=4,071<br>Uninfected pool=64,559<br><i>Uninfected controls=12,213*****</i> | -                                                                                                                                                                      |
| <b>Cohort 10</b><br><i>Pregnancy-related bleeding</i>                                                                                                                                                                                                                                                                                                                                                                                                                                                   | Pregnancies where mother was vaccinated in exposure period (N=12,808)<br>Pregnancies with pregnancy-related bleeding diagnosis before first infection date in exposure period (N=101)       | Infected=3,973<br>Uninfected pool=64,559<br><i>Uninfected controls=11,919*****</i> | -                                                                                                                                                                      |

**Supplementary Figure 1: Selection of pregnancies for the analysis of association between SARS-CoV-2 infection and all neonatal and maternal outcomes.**

†This includes 1,429 pregnancies where the woman had both infection and vaccination in the pregnancy exposure period, and 11,379 where the woman had vaccination only.



\*Multiple exclusion criteria may have applied for a given pregnancy, but each was only counted in the first exclusion criteria in the order of appearance in this box.

\*\*Each cohort was drawn independently, so the controls will vary between the different cohorts.

\*\*\*After cohort matching, we removed any of the infected group with missing data for a specific outcome and their controls, as well as any additional controls with missing data.

\*\*\*\*Data only missing for delivery onset, so affecting only analyses looking at spontaneous or provider-initiated (very) preterm birth. No missing data for any (very) preterm birth.

\*\*\*\*\*Exposed pregnancies could only be matched to uninfected control pregnancies that had not had the outcome prior to the gestational week at matching.

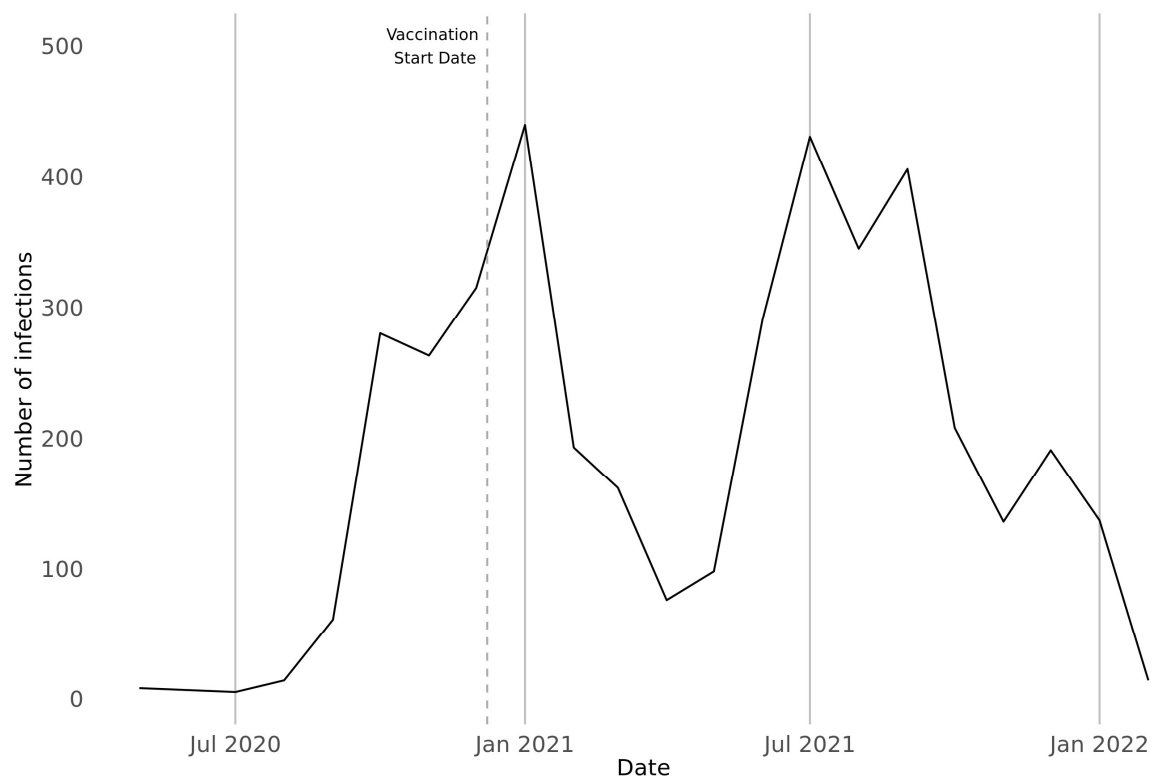

***Supplementary Figure 2: Distribution of infections over time in our infected cohort (numbers from cohort 1).***

| <p>Completed and ongoing pregnancies [neonates] from Jan 01, 2015 to July 13, 2022<br/>N=575,272 [581,370]</p> <p>Excluded pregnancies [neonates]*<br/>Completed pregnancies with unknown outcome=5,737 [5,738]<br/>Pregnancies ending before 20 weeks gestation, terminations and ongoing pregnancies=192,620 [192,724]<br/>Pregnancies conceived ≥June 2, 2021 [could not reach 40+6 weeks gestation by February 28, 2022]=16,941 [17,241]<br/>Pre-pandemic period pregnancies ending &lt;1 March 2020=267,532 [271,840]<br/>Pregnancies completed by December 08, 2020= 36,485 [37,070]<br/>Multiple pregnancies= 790 [1,590]</p> <p>Pandemic vaccination period singleton neonates/pregnancies<br/>N=55,167</p> |                                                                                                                                                                                            |                                                                                            |                                                                                                                                                                          |
|---------------------------------------------------------------------------------------------------------------------------------------------------------------------------------------------------------------------------------------------------------------------------------------------------------------------------------------------------------------------------------------------------------------------------------------------------------------------------------------------------------------------------------------------------------------------------------------------------------------------------------------------------------------------------------------------------------------------|--------------------------------------------------------------------------------------------------------------------------------------------------------------------------------------------|--------------------------------------------------------------------------------------------|--------------------------------------------------------------------------------------------------------------------------------------------------------------------------|
| Cohort name (outcomes)                                                                                                                                                                                                                                                                                                                                                                                                                                                                                                                                                                                                                                                                                              | Cohort exclusion criteria (number excluded)                                                                                                                                                | Final matched cohort numbers**                                                             | Final analysis numbers for matched cohorts with missing outcome data***                                                                                                  |
| <b>Cohort 1</b><br><i>Stillbirth</i><br><i>Extended perinatal mortality</i>                                                                                                                                                                                                                                                                                                                                                                                                                                                                                                                                                                                                                                         | Neonates of mothers infected in exposure period (N=5,434)†                                                                                                                                 | Vaccinated=11,379<br>Unvaccinated pool=38,354<br><i>Unvaccinated controls</i> =22,758      | -                                                                                                                                                                        |
| <b>Cohort 2</b><br><i>Neonatal death</i>                                                                                                                                                                                                                                                                                                                                                                                                                                                                                                                                                                                                                                                                            | Neonates of mothers infected in exposure period (N=5,434)<br>Stillbirths (N=139)                                                                                                           | Vaccinated=11,350<br>Unvaccinated pool=38,244<br><i>Unvaccinated controls</i> =22,700      | -                                                                                                                                                                        |
| <b>Cohort 3</b><br><i>Small for gestational age</i><br><i>Very small for gestational age</i>                                                                                                                                                                                                                                                                                                                                                                                                                                                                                                                                                                                                                        | Neonates of mothers infected in exposure period (N=5,434)<br>Stillbirths (N=139)<br>Neonates <23 or >42 weeks gestation (N=42)                                                             | Vaccinated=11,338<br>Unvaccinated pool=38,214<br><i>Unvaccinated controls</i> =22,676      | Vaccinated=10,951 (387 missing data)<br><i>Unvaccinated controls</i> =21,267<br>(1,409 missing data or controls of vaccinated neonates missing data)                     |
| <b>Cohort 4</b><br><i>Low Apgar score at term</i><br><i>Very low Apgar score at term</i>                                                                                                                                                                                                                                                                                                                                                                                                                                                                                                                                                                                                                            | Neonates of mothers infected in exposure period (N=5,434)<br>Stillbirths (N=139)<br>Neonates <37 weeks gestation (N=2,870)                                                                 | Vaccinated=10,752<br>Unvaccinated pool=35,972<br><i>Unvaccinated controls</i> =21,504      | Vaccinated=10,286 (466 missing data)<br><i>Unvaccinated controls</i> =19,761<br>(1,743 missing data or controls of vaccinated neonates missing data)                     |
| <b>Cohort 5</b><br><i>Any preterm birth</i><br><i>Spontaneous preterm birth</i><br><i>Provider-initiated preterm birth</i>                                                                                                                                                                                                                                                                                                                                                                                                                                                                                                                                                                                          | Neonates ≥37 weeks gestation at start of vaccination programme (N=1,781)<br>Neonates of mothers infected in exposure period (N=4,718)<br>Stillbirths (N=134)                               | Vaccinated=11,202<br>Unvaccinated pool=37,332<br><i>Unvaccinated controls</i> =22,404      | Vaccinated=11,193 (9 missing delivery onset)****<br><i>Unvaccinated controls</i> =22,362 (42 missing delivery onset or controls of vaccinated neonates missing data)**** |
| <b>Cohort 6</b><br><i>Very preterm birth</i><br><i>Spontaneous very preterm birth</i><br><i>Provider-initiated very preterm birth</i>                                                                                                                                                                                                                                                                                                                                                                                                                                                                                                                                                                               | Neonates ≥32 weeks gestation at start of vaccination programme (N=5,730)<br>Neonates of mothers infected in exposure period (N=3,529)<br>Stillbirths (N=134)                               | Vaccinated=10,057<br>Unvaccinated pool=35,717<br><i>Unvaccinated controls</i> =20,114      | Vaccinated=10,052 (5 missing delivery onset)****<br><i>Unvaccinated controls</i> =20,101 (13 missing delivery onset or controls of vaccinated neonates missing data)**** |
| <b>Cohort 7</b><br><i>Critical care admission or death</i>                                                                                                                                                                                                                                                                                                                                                                                                                                                                                                                                                                                                                                                          | Pregnancies where mother was infected in exposure period (N=5,434)                                                                                                                         | Vaccinated=11,379<br>Unvaccinated pool=38,354<br><i>Unvaccinated controls</i> =22,758      | -                                                                                                                                                                        |
| <b>Cohort 8</b><br><i>Venous thromboembolism</i>                                                                                                                                                                                                                                                                                                                                                                                                                                                                                                                                                                                                                                                                    | Pregnancies where mother was infected in exposure period (N=5,434)<br>Pregnancies with venous thromboembolism diagnosis before first vaccination date in exposure period (N=4)             | Vaccinated=11,375<br>Unvaccinated pool=38,354<br><i>Unvaccinated controls</i> =34,125***** | -                                                                                                                                                                        |
| <b>Cohort 9</b><br><i>Hypertensive disorders of pregnancy</i>                                                                                                                                                                                                                                                                                                                                                                                                                                                                                                                                                                                                                                                       | Pregnancies where mother was infected in exposure period (N=5,434)<br>Pregnancies with hypertensive disorder of pregnancy diagnosis before first vaccination date in exposure period (N=6) | Vaccinated=11,373<br>Unvaccinated pool=38,354<br><i>Unvaccinated controls</i> =34,119***** | -                                                                                                                                                                        |
| <b>Cohort 10</b><br><i>Pregnancy-related bleeding</i>                                                                                                                                                                                                                                                                                                                                                                                                                                                                                                                                                                                                                                                               | Pregnancies where mother was infected in exposure period (N=5,434)<br>Pregnancies with pregnancy-related bleeding diagnosis before first vaccination date in exposure period (N=149)       | Vaccinated=11,230<br>Unvaccinated pool=38,354<br><i>Unvaccinated controls</i> =22,460***** | -                                                                                                                                                                        |

**Supplementary Figure 3: Selection of pregnancies for the analysis of association between COVID-19 vaccination and all neonatal and maternal outcomes.**

†This includes 1,429 pregnancies where the woman had both vaccination and infection in the pregnancy exposure period, and 4,005 where the woman had infection only.

\*Multiple exclusion criteria may have applied for a given pregnancy, but each was only counted in the first exclusion criteria in the order of appearance in this box.

\*\*Each cohort was drawn independently, so the controls vary between the different cohorts.

\*\*\*After cohort matching, we removed any of the vaccinated group with missing data for a specific outcome and their controls, as well as any additional controls with missing data.

\*\*\*\*Data only missing for delivery onset, so affecting only analyses looking at spontaneous or provider-initiated (very) preterm birth. No missing data for any (very) preterm birth.

\*\*\*\*\*Exposed pregnancies could only be matched to unvaccinated control pregnancies that had not had the outcome prior to the gestational week at matching.

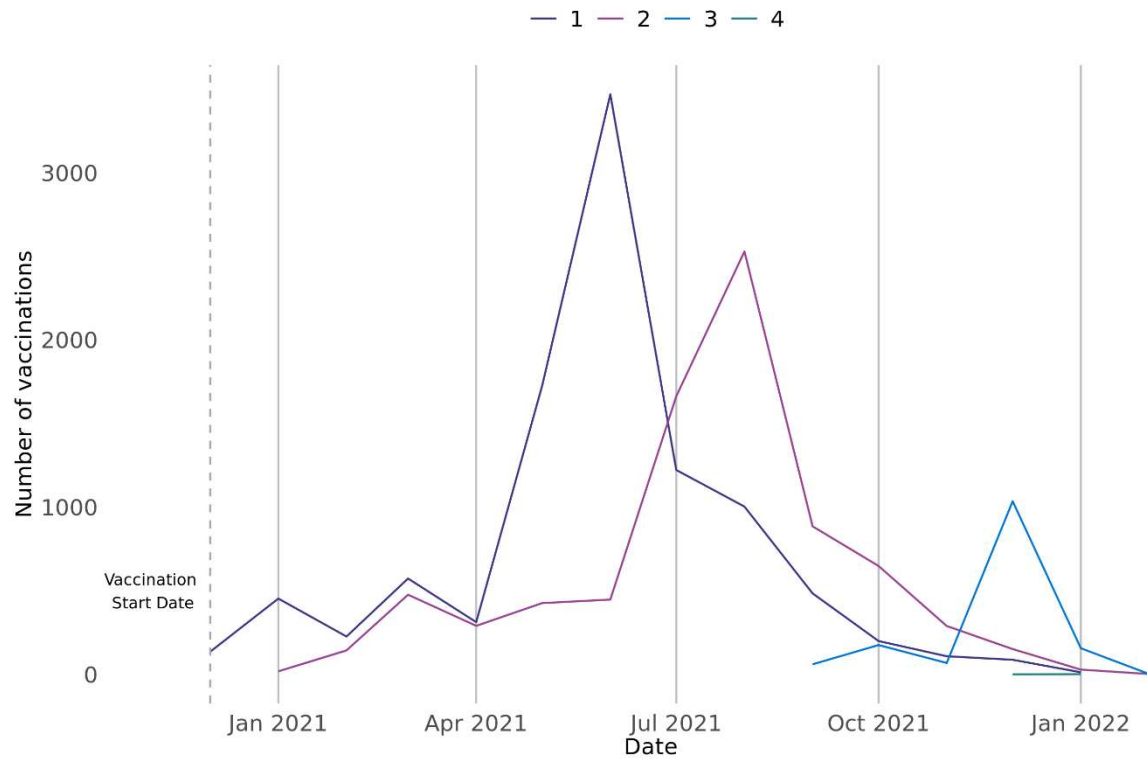

**Supplementary Figure 4: Distribution of vaccinations over time in our vaccinated cohort (numbers from cohort 1), by vaccine dose number.**

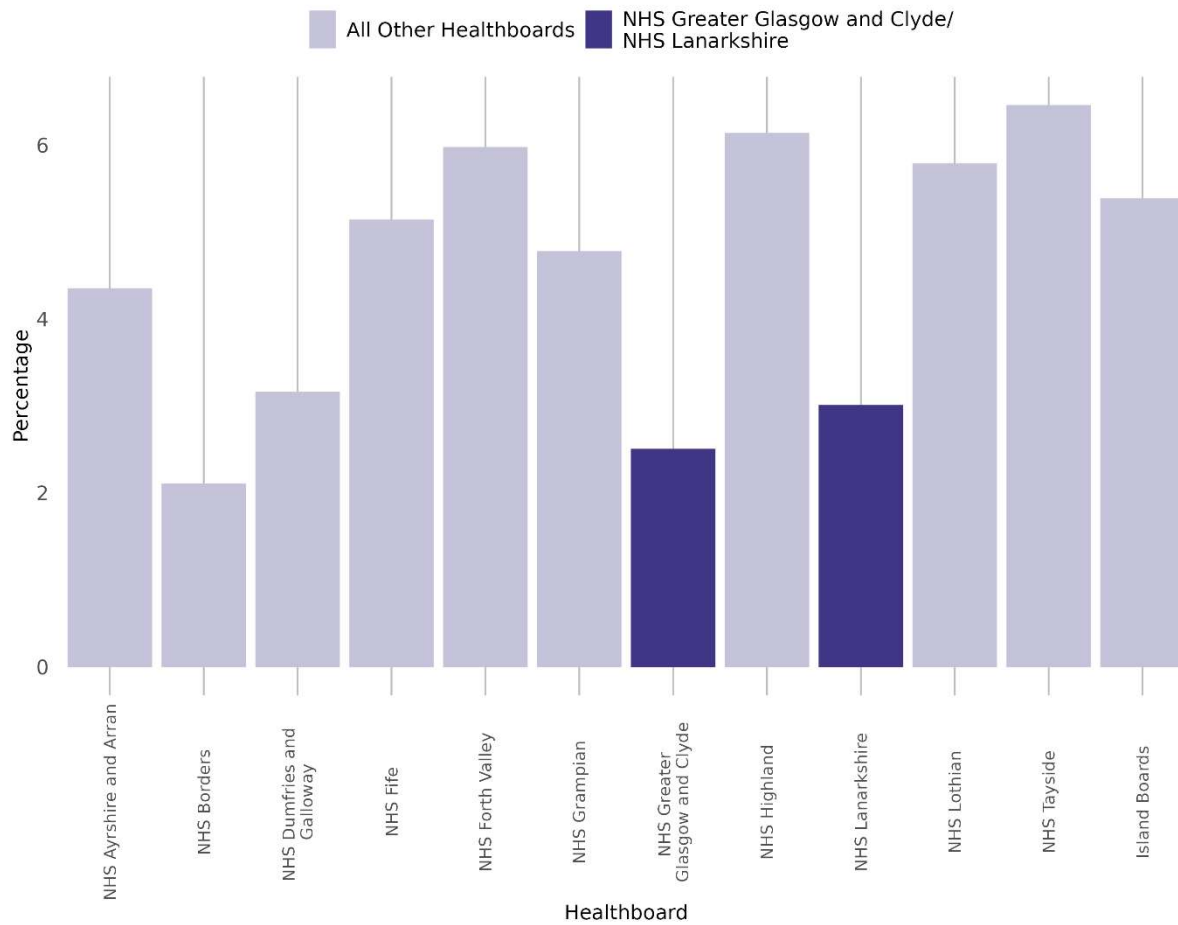

All SMR02 records from March 2020 to May 2022

***Supplementary Figure 5: Percentage of all maternity records between March 2020 and May 2022 with hypertensive disorders of pregnancy coded as a diagnosis by healthboard.***

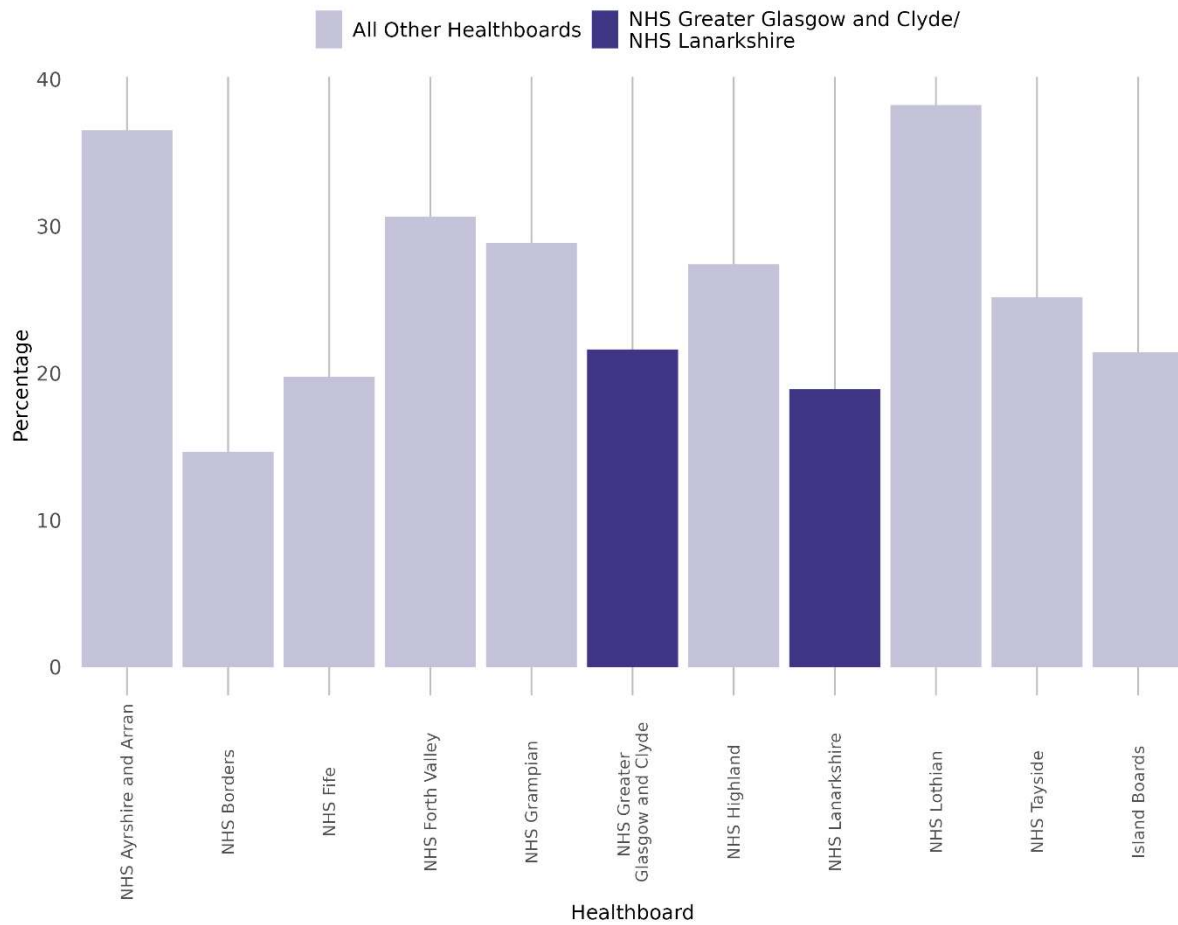

All SMR02 records from March 2020 to May 2022

***Supplementary Figure 6: Percentage of all maternity records between March 2020 and May 2022 with pregnancy-related bleeding coded as a diagnosis by healthboard.***
